# Supplementary material
Source: PubMed Central journal article supplement (PMC9890970)

**ESM Table 1.** Alternate Mediterranean Diet (aMED) components and criteria for scoring

| <b>Component</b>                      | <b>Criteria for 0 point</b> | <b>Criteria for 1 point</b> |
|---------------------------------------|-----------------------------|-----------------------------|
| Fresh fruit (excluding juices)        | < Median                    | ≥ Median                    |
| Fresh vegetables (excluding potatoes) | < Median                    | ≥ Median                    |
| Whole grains                          | < Median                    | ≥ Median                    |
| Nuts                                  | < Median                    | ≥ Median                    |
| Legumes                               | < Median                    | ≥ Median                    |
| Red & processed meat                  | ≥ Median                    | < Median                    |
| Fish & shellfish                      | < Median                    | ≥ Median                    |
| MUFA:SFA ratio                        | < Median                    | ≥ Median                    |
| Alcohol                               |                             |                             |
| <i>Women</i>                          | < 5 or >15 g/d              | 5-15 g/d                    |
| <i>Men</i>                            | < 10 or > 25 g/d            | 10-25 g/d                   |
| <b>TOTAL</b>                          | <b>0</b>                    | <b>9</b>                    |

MUFA, monounsaturated fatty acids; SFA, saturated fatty acids.

**ESM Table 2.** Healthy Eating Index (HEI)-2015 components and criteria for scoring\*

| <b>Component</b>                      | <b>Maximum point</b> | <b>Daily intake for the maximum points</b> | <b>Daily intake for 0 point</b> |
|---------------------------------------|----------------------|--------------------------------------------|---------------------------------|
| Whole grains                          | 10                   | ≥ 1.5 oz                                   | 0                               |
| Total fruit                           | 5                    | ≥ 0.8 cups                                 | 0                               |
| Fresh fruit (excluding juices)        | 5                    | ≥ 0.4 cups                                 | 0                               |
| Fresh vegetables (excluding potatoes) | 5                    | ≥ 1.1 cups                                 | 0                               |
| Greens & beans                        | 5                    | ≥ 0.2 cups                                 | 0                               |
| Total protein foods                   | 5                    | ≥ 2.5 oz                                   | 0                               |
| Seafood & plant proteins              | 5                    | ≥ 0.8 oz                                   | 0                               |
| Total dairy                           | 10                   | ≥ 1.3 cups                                 | 0                               |
| Fatty acid ratio                      | 10                   | (PUFA + MUFA) /SFA ≥ 2.5                   | (PUFA + MUFA) /SFA ≤ 1.2        |
| Sodium                                | 10                   | ≤ 1.1 g                                    | ≥ 2.0 g                         |
| Refined grains                        | 10                   | ≤ 1.8 oz                                   | ≥ 4.3 oz                        |
| Added sugars                          | 10                   | ≤ 6.5% of energy                           | ≥ 26% of energy                 |
| Saturated fats                        | 10                   | ≤ 8% of energy                             | ≥ 16% of energy                 |
| <b>TOTAL</b>                          | <b>100</b>           |                                            |                                 |

\*All standards for food groups in HEI-2015 represent amounts per 4184 kJ (1000 kcal). Definitions and determination of what counts as one cup or ounce equivalent of food groups can be found at:

[https://www.ars.usda.gov/ARSEUserFiles/80400530/pdf/mped/mped2\\_doc.pdf](https://www.ars.usda.gov/ARSEUserFiles/80400530/pdf/mped/mped2_doc.pdf)

MUFA, monounsaturated fatty acids; oz, ounce; PUFA, polyunsaturated fatty acids; SFA, saturated fatty acids.

**ESM Table 3.** Healthful Plant-based Diet Index (hPDI) components and criteria for scoring

| Component                                 | Criteria for minimum point<br>(1) | Criteria for maximum point<br>(5) |
|-------------------------------------------|-----------------------------------|-----------------------------------|
| <b><i>Healthy plant food groups</i></b>   |                                   |                                   |
| Whole grains                              | Lowest quintile                   | Highest quintile                  |
| Fresh fruit (excluding juices)            | Lowest quintile                   | Highest quintile                  |
| Fresh vegetables (excluding potatoes)     | Lowest quintile                   | Highest quintile                  |
| Nuts & legumes                            | Lowest quintile                   | Highest quintile                  |
| Vegetable oils                            | Lowest quintile                   | Highest quintile                  |
| Coffee & tea (unsweetened)                | Lowest quintile                   | Highest quintile                  |
| <b><i>Unhealthy plant food groups</i></b> |                                   |                                   |
| SSB & fruit juices                        | Highest quintile                  | Lowest quintile                   |
| Refined grains                            | Highest quintile                  | Lowest quintile                   |
| Potatoes                                  | Highest quintile                  | Lowest quintile                   |
| Sweets & desserts                         | Highest quintile                  | Lowest quintile                   |
| <b><i>Animal food groups</i></b>          |                                   |                                   |
| Red & processed meat                      | Highest quintile                  | Lowest quintile                   |
| White meat (poultry & fish/shellfish)     | Highest quintile                  | Lowest quintile                   |
| Eggs                                      | Highest quintile                  | Lowest quintile                   |
| Dairy                                     | Highest quintile                  | Lowest quintile                   |
| Animal fat                                | Highest quintile                  | Lowest quintile                   |
| TOTAL                                     | 15                                | 75                                |

SSB, sugar-sweetened beverages.

**ESM Table 4.** Age-adjusted baseline population characteristics according to quintile of dietary pattern scores\*

|                                    | aMED       |            |            | HEI-2015        |                  |                  | hPDI         |            |            |
|------------------------------------|------------|------------|------------|-----------------|------------------|------------------|--------------|------------|------------|
|                                    | Q1         | Q3         | Q5         | Q1              | Q3               | Q5               | Q1           | Q3         | Q5         |
| Score median (range)               | 1 (0-1)    | 3 (3-3)    | 5 (5-8)    | 35.4 (8.6-41.6) | 53.8 (50.0-57.6) | 72.9 (66.5-96.8) | 38 (25-40)   | 46 (45-47) | 54 (52-68) |
| Age, years                         | 36.0 (0.8) | 39.3 (0.9) | 41.9 (1.4) | 37.6 (0.7)      | 38.5 (0.8)       | 43.5 (1.2)       | 33.8 (0.6)   | 39.3 (0.9) | 43.3 (1.2) |
| Male, %                            | 55.8       | 49.5       | 44.6       | 52.2            | 51.9             | 39.2             | 60.4         | 48.6       | 34.1       |
| Study field center, %              |            |            |            |                 |                  |                  |              |            |            |
| Bronx                              | 37.7       | 25.7       | 17.6       | 35.3            | 24.5             | 18.2             | 25.8         | 26.2       | 26.3       |
| Chicago                            | 9.9        | 15.5       | 19.0       | 13.6            | 9.7              | 25.9             | 11.1         | 11.0       | 19.7       |
| Miami                              | 39.0       | 39.2       | 19.0       | 37.9            | 36.9             | 19.9             | 43.3         | 36.6       | 23.4       |
| San Diego                          | 13.4       | 19.7       | 44.4       | 13.2            | 28.8             | 36.0             | 19.8         | 26.2       | 30.6       |
| Hispanic background, %             |            |            |            |                 |                  |                  |              |            |            |
| Central/South American             | 11.5       | 13.5       | 11.0       | 13.7            | 13.6             | 9.3              | 12.2         | 14.2       | 12.4       |
| Cuban                              | 31.8       | 28.0       | 9.0        | 27.8            | 25.2             | 12.2             | 31.0         | 26.4       | 12.7       |
| Dominican                          | 9.7        | 10.9       | 4.4        | 9.6             | 10.6             | 7.5              | 8.4          | 9.2        | 11.6       |
| Mexican                            | 15.4       | 30.5       | 63.9       | 17.8            | 34.0             | 58.8             | 23.5         | 33.7       | 49.3       |
| Puerto-Rican                       | 28.0       | 13.9       | 8.5        | 26.4            | 11.6             | 8.3              | 18.9         | 13.5       | 9.3        |
| Other heritage                     | 3.6        | 3.2        | 3.3        | 4.7             | 5.0              | 3.8              | 6.0          | 3.0        | 4.6        |
| Above high school education, %     | 41.3       | 41.5       | 49.2       | 37.4            | 44.8             | 46.7             | 42.6         | 42.5       | 45.5       |
| Annual household income, %         |            |            |            |                 |                  |                  |              |            |            |
| < \$30,000                         | 62.7       | 53.4       | 50.2       | 60.2            | 52.9             | 54.5             | 55.6         | 54.4       | 58.0       |
| ≥ \$30,000                         | 30.5       | 38.7       | 46.2       | 33.4            | 38.0             | 42.7             | 38.0         | 37.1       | 37.4       |
| Not reported                       | 6.8        | 7.9        | 3.6        | 6.4             | 9.1              | 2.8              | 6.4          | 8.4        | 4.6        |
| Current smoker, %                  | 32.0       | 21.8       | 16.2       | 29.1            | 22.4             | 12.7             | 30.2         | 21.6       | 23.5       |
| Moderate drinker†, %               | 2.3        | 5.9        | 17.2       | 5.0             | 5.7              | 5.8              | 7.3          | 5.6        | 4.1        |
| Use of antihypertensive drugs, %   | 11.9       | 11.1       | 10.1       | 9.1             | 8.3              | 10.6             | 8.4          | 10.4       | 10.5       |
| Use of lipid-lowering drugs, %     | 4.1        | 6.1        | 5.8        | 6.9             | 4.5              | 6.8              | 4.1          | 8.4        | 5.8        |
| Fasting hours for blood samples    | 14.5 (0.2) | 14.1 (0.1) | 14.2 (0.1) | 14.4 (0.1)      | 14.0 (0.1)       | 14.0 (0.1)       | 14.1 (0.1)   | 14.3 (0.2) | 14.2 (0.1) |
| Body mass index, kg/m <sup>2</sup> | 28.8 (0.4) | 28.8 (0.3) | 28.8 (0.5) | 28.8 (0.3)      | 28.8 (0.4)       | 28.6 (0.5)       | 29.6 (0.7)   | 28.7 (0.3) | 28.3 (0.5) |
| Physical activity, MET-hours/d     | 11.0 (1.1) | 10.2 (0.6) | 12.9 (1.0) | 10.8 (0.9)      | 11.8 (1.0)       | 13.4 (1.0)       | 14.5 (1.2)   | 13.3 (1.2) | 11.0 (0.9) |
| Total energy intake, kJ/d          | 8707 (272) | 8703 (172) | 8878 (297) | 8820 (238)      | 8975 (226)       | 8171 (289)       | 10,996 (234) | 8096 (259) | 6929 (218) |

aMED, alternate Mediterranean diet; HEI, Healthy Eating Index; hPDI, healthful Plant-based Diet Index; MET, metabolic equivalent; Q, quintile.

\*Data are presented as age-adjusted mean (standard error) for continuous variables (except for age) or percentage for categorical variables after weighting for the complex survey design.

†Alcohol consumption of 5-15 g/d for women or 10-25 g/d for men.

**ESM Table 5.** Age-adjusted mean intake of food groups or nutrients according to quintile of dietary pattern scores

|                                         | aMED quintile |      |      |      |      | HEI-2015 quintile |      |      |      |      | hPDI quintile |      |      |      |      |
|-----------------------------------------|---------------|------|------|------|------|-------------------|------|------|------|------|---------------|------|------|------|------|
|                                         | Q1            | Q2   | Q3   | Q4   | Q5   | Q1                | Q2   | Q3   | Q4   | Q5   | Q1            | Q2   | Q3   | Q4   | Q5   |
| <b><i>Food groups, servings/d</i></b>   |               |      |      |      |      |                   |      |      |      |      |               |      |      |      |      |
| Whole grains                            | 0.31          | 0.68 | 1.42 | 2.18 | 2.79 | 0.23              | 0.66 | 1.26 | 2.06 | 3.56 | 0.61          | 1.04 | 1.37 | 1.82 | 2.67 |
| Refined grains                          | 6.19          | 5.87 | 5.09 | 5.39 | 4.53 | 7.27              | 6.76 | 5.06 | 4.21 | 2.88 | 7.46          | 6.32 | 4.94 | 4.55 | 2.76 |
| Fresh fruit (excluding juices)          | 0.25          | 0.59 | 1.21 | 1.46 | 1.78 | 0.30              | 0.53 | 0.95 | 1.67 | 2.18 | 0.45          | 0.70 | 0.86 | 1.38 | 2.14 |
| Fresh vegetables (excluding potatoes)   | 0.88          | 1.67 | 2.15 | 2.58 | 3.67 | 1.32              | 1.90 | 2.15 | 2.35 | 3.31 | 1.65          | 1.93 | 1.83 | 2.43 | 3.15 |
| Nuts                                    | 0.03          | 0.03 | 0.09 | 0.32 | 0.78 | 0.04              | 0.13 | 0.17 | 0.28 | 0.58 | 0.07          | 0.11 | 0.24 | 0.23 | 0.52 |
| Legumes                                 | 0.14          | 0.29 | 0.67 | 0.80 | 0.82 | 0.12              | 0.48 | 0.58 | 0.77 | 0.83 | 0.24          | 0.44 | 0.48 | 0.78 | 0.89 |
| Greens & beans                          | 0.17          | 0.43 | 0.94 | 1.10 | 1.30 | 0.17              | 0.59 | 0.78 | 1.05 | 1.52 | 0.36          | 0.58 | 0.66 | 1.17 | 1.31 |
| Potatoes                                | 0.57          | 0.39 | 0.40 | 0.41 | 0.28 | 0.47              | 0.53 | 0.38 | 0.37 | 0.25 | 0.85          | 0.43 | 0.27 | 0.20 | 0.09 |
| Sweets & desserts                       | 0.18          | 0.98 | 0.87 | 0.92 | 1.18 | 1.10              | 1.08 | 0.86 | 0.96 | 1.03 | 1.62          | 0.97 | 0.85 | 0.72 | 0.59 |
| Red & processed meat                    | 4.00          | 3.39 | 3.21 | 2.62 | 1.59 | 3.68              | 3.26 | 3.32 | 2.69 | 1.80 | 3.82          | 3.34 | 2.70 | 2.78 | 2.08 |
| Poultry                                 | 1.26          | 1.91 | 1.79 | 2.16 | 2.01 | 1.63              | 1.93 | 2.04 | 1.91 | 1.50 | 2.50          | 2.08 | 1.62 | 1.46 | 1.14 |
| Fish & shellfish                        | 0.01          | 0.30 | 0.30 | 0.47 | 0.69 | 0.13              | 0.58 | 0.36 | 0.20 | 0.38 | 0.61          | 0.19 | 0.33 | 0.21 | 0.25 |
| Eggs                                    | 0.44          | 0.50 | 0.44 | 0.46 | 0.52 | 0.47              | 0.50 | 0.48 | 0.41 | 0.49 | 0.79          | 0.45 | 0.35 | 0.34 | 0.29 |
| Dairy products                          | 1.93          | 1.71 | 1.46 | 1.48 | 1.50 | 1.78              | 1.52 | 1.61 | 1.51 | 1.65 | 2.15          | 1.62 | 1.53 | 1.36 | 1.12 |
| Total protein foods                     | 6.03          | 6.71 | 7.17 | 7.65 | 7.26 | 6.20              | 7.35 | 7.55 | 7.02 | 6.47 | 8.28          | 7.07 | 6.19 | 6.58 | 6.11 |
| Seafood & plant proteins                | 0.33          | 0.91 | 1.73 | 2.41 | 3.14 | 0.43              | 1.67 | 1.70 | 2.01 | 2.67 | 1.17          | 1.20 | 1.52 | 2.01 | 2.60 |
| Animal fat                              | 1.30          | 1.32 | 1.07 | 1.16 | 1.16 | 1.78              | 1.27 | 0.90 | 1.08 | 0.89 | 2.31          | 1.33 | 0.87 | 0.61 | 0.33 |
| Vegetable oils                          | 1.60          | 2.45 | 1.69 | 2.85 | 2.64 | 1.86              | 2.88 | 2.79 | 2.26 | 2.40 | 2.19          | 2.61 | 2.23 | 2.90 | 2.50 |
| Coffee (unsweetened)                    | 0.49          | 0.32 | 0.50 | 0.51 | 0.65 | 0.59              | 0.39 | 0.55 | 0.41 | 0.48 | 0.32          | 0.41 | 0.50 | 0.57 | 0.70 |
| Tea (unsweetened)                       | 0.16          | 0.14 | 0.19 | 0.22 | 0.49 | 0.16              | 0.13 | 0.22 | 0.16 | 0.51 | 0.06          | 0.11 | 0.14 | 0.23 | 0.67 |
| SSB                                     | 2.86          | 2.63 | 2.45 | 2.53 | 2.08 | 2.11              | 2.41 | 2.85 | 2.48 | 2.40 | 3.69          | 2.52 | 2.39 | 2.00 | 1.05 |
| Fruit juices                            | 0.65          | 0.82 | 0.69 | 0.80 | 0.80 | 0.37              | 0.58 | 0.96 | 0.94 | 0.99 | 1.06          | 0.68 | 0.77 | 0.72 | 0.35 |
| <b><i>Nutrients/food components</i></b> |               |      |      |      |      |                   |      |      |      |      |               |      |      |      |      |
| SFA, % of energy                        | 12.5          | 10.9 | 10.0 | 9.1  | 8.3  | 12.7              | 10.6 | 10.0 | 9.0  | 8.0  | 11.9          | 10.4 | 10.2 | 9.3  | 8.5  |
| Ratio of MUFA:SFA                       | 0.94          | 1.10 | 1.19 | 1.29 | 1.50 | 0.98              | 1.20 | 1.21 | 1.21 | 1.41 | 1.09          | 1.13 | 1.15 | 1.26 | 1.38 |
| Ratio of (MUFA+PUFA):SFA                | 1.50          | 1.84 | 1.97 | 2.13 | 2.49 | 1.53              | 2.00 | 1.98 | 2.06 | 2.38 | 1.76          | 1.87 | 1.91 | 2.12 | 2.31 |
| Sodium, g/4184 kJ (1000 kcal)/d         | 1.69          | 1.67 | 1.70 | 1.77 | 1.68 | 1.93              | 1.81 | 1.72 | 1.51 | 1.42 | 1.74          | 1.70 | 1.69 | 1.72 | 1.63 |
| Added sugars, % of energy               | 14.3          | 10.8 | 12.0 | 11.4 | 11.3 | 18.3              | 13.3 | 12.6 | 9.6  | 3.0  | 8.4           | 12.2 | 12.6 | 13.7 | 13.9 |

aMED, alternate Mediterranean diet; HEI, Healthy Eating Index; hPDI, healthful Plant-based Diet Index; MUFA, monounsaturated fatty acids; PUFA, polyunsaturated fatty acids; Q, quintile; SFA, saturated fatty acids; SSB, sugar-sweetened beverages.

**ESM Table 6.** Number and percentage of total and dietary pattern-related metabolites according to metabolomic super-pathways

| Super-pathways     | All metabolites |            | Significant metabolites |            | Shared metabolites |            | aMED-only metabolites |            | HEI-2015-only metabolites |            | hPDI-only metabolites |            |
|--------------------|-----------------|------------|-------------------------|------------|--------------------|------------|-----------------------|------------|---------------------------|------------|-----------------------|------------|
|                    | <i>N</i>        | %          | <i>N</i>                | %          | <i>N</i>           | %          | <i>N</i>              | %          | <i>N</i>                  | %          | <i>N</i>              | %          |
| Amino acid         | 161             | 25.8       | 35                      | 22.3       | 13                 | 32.5       | 2                     | 4.0        | 3                         | 23.1       | 6                     | 37.5       |
| Carbohydrate       | 20              | 3.2        | 9                       | 5.7        | 1                  | 2.5        | 5                     | 10.0       | 2                         | 15.4       | 0                     | 0.0        |
| Cofactor & vitamin | 20              | 3.2        | 9                       | 5.7        | 7                  | 17.5       | 0                     | 0.0        | 0                         | 0.0        | 1                     | 6.3        |
| Energy             | 10              | 1.6        | 3                       | 1.9        | 1                  | 2.5        | 1                     | 2.0        | 0                         | 0.0        | 0                     | 0.0        |
| Lipid              | 285             | 45.7       | 51                      | 32.5       | 3                  | 7.5        | 30                    | 60.0       | 3                         | 23.1       | 8                     | 50.0       |
| Nucleotide         | 30              | 4.8        | 7                       | 4.5        | 1                  | 2.5        | 3                     | 6.0        | 1                         | 7.7        | 0                     | 0.0        |
| Peptide            | 28              | 4.5        | 6                       | 3.8        | 0                  | 0.0        | 3                     | 6.0        | 0                         | 0.0        | 0                     | 0.0        |
| Xenobiotic         | 70              | 11.2       | 37                      | 23.6       | 14                 | 35.0       | 6                     | 12.0       | 4                         | 30.8       | 1                     | 6.3        |
| <b>TOTAL</b>       | <b>624</b>      | <b>100</b> | <b>157</b>              | <b>100</b> | <b>40</b>          | <b>100</b> | <b>50</b>             | <b>100</b> | <b>13</b>                 | <b>100</b> | <b>16</b>             | <b>100</b> |

aMED, alternate Mediterranean diet; HEI, Healthy Eating Index; hPDI, healthful Plant-based Diet Index.

**ESM Table 7.** Percent variations in dietary scores potentially explained by serum metabolites

|                                                                    | PC1   | PC2  | PC3  | PC4  | PC5  | All 5 PCs    |
|--------------------------------------------------------------------|-------|------|------|------|------|--------------|
| <b>All 624 metabolites</b>                                         |       |      |      |      |      |              |
| aMED                                                               | 0.0%  | 0.2% | 0.6% | 0.3% | 0.0% | <b>1.1%</b>  |
| HEI-2015                                                           | 0.1%  | 0.6% | 0.3% | 0.2% | 0.1% | <b>1.2%</b>  |
| hPDI                                                               | 0.2%  | 2.5% | 0.0% | 2.2% | 0.6% | <b>5.5%</b>  |
| <b>40 metabolites associated with all 3 dietary pattern scores</b> |       |      |      |      |      |              |
| aMED                                                               | 16.3% | 0.1% | 0.2% | 2.3% | 0.5% | <b>19.4%</b> |
| HEI-2015                                                           | 15.6% | 0.5% | 0.4% | 1.7% | 0.7% | <b>19.0%</b> |
| hPDI                                                               | 14.3% | 0.0% | 0.1% | 0.7% | 1.7% | <b>16.8%</b> |

aMED, alternate Mediterranean diet; HEI, Healthy Eating Index; hPDI, healthful Plant-based Diet Index; PC, principal components.

**ESM Table 8.** Multivariable-adjusted association between scores of dietary-pattern-related metabolites and risk of diabetes, excluding 731 individuals with dyslipidemia at baseline

|                                                        | Metabolites<br>(N) | Tertile for metabolite score |                  |                  | P-trend |
|--------------------------------------------------------|--------------------|------------------------------|------------------|------------------|---------|
|                                                        |                    | T1                           | T2               | T3               |         |
| <b>Score of metabolites positively associated with</b> |                    |                              |                  |                  |         |
| aMED only                                              | 4                  | 1.00 (Referent)              | 0.80 (0.44-1.47) | 0.59 (0.30-1.15) | 0.10    |
| HEI-2015 only                                          | 6                  | 1.00 (Referent)              | 0.85 (0.43-1.72) | 0.89 (0.44-1.81) | 0.75    |
| hPDI only                                              | 5                  | 1.00 (Referent)              | 0.64 (0.32-1.29) | 1.39 (0.73-2.67) | 0.33    |
| All dietary scores                                     | 32                 | 1.00 (Referent)              | 0.92 (0.54-1.59) | 0.71 (0.39-1.31) | 0.28    |
| <b>Score of metabolites inversely associated with</b>  |                    |                              |                  |                  |         |
| aMED only                                              | 46                 | 1.00 (Referent)              | 0.48 (0.24-0.96) | 0.77 (0.37-1.56) | 0.43    |
| HEI-2015 only                                          | 7                  | 1.00 (Referent)              | 0.92 (0.41-2.03) | 0.64 (0.27-1.51) | 0.30    |
| hPDI only                                              | 11                 | 1.00 (Referent)              | 0.97 (0.48-1.95) | 1.01 (0.50-2.02) | 0.99    |
| All dietary scores                                     | 8                  | 1.00 (Referent)              | 1.93 (0.93-4.00) | 3.78 (2.18-6.56) | <0.0001 |

aMED, alternate Mediterranean diet; HEI, Healthy Eating Index; hPDI, healthful Plant-based Diet Index; T, tertile. Results are relative risks (95% CI) from survey Poisson regressions with adjustment for age, sex, study field center, Hispanic/Latino background, education, annual household income, smoking status, drinking status (not for aMED-only metabolite score), total energy intake, physical activity, BMI, hypertension, dyslipidemia, and fasting hours for blood samples.



**ESM Table 9.** Association between 8 metabolites inversely associated with 3 dietary scores and risk of diabetes

|                          | Pyrraline        | N1-methylinosine | $\gamma/\beta$ -Tocopherol | Mannose          | Proline          | Trans-4-hydroxyproline | P-cresol-glucuronide | N-acetyl-cadaverine |
|--------------------------|------------------|------------------|----------------------------|------------------|------------------|------------------------|----------------------|---------------------|
| <b>Overall, per SD</b>   | 1.03 (0.79-1.33) | 1.16 (0.95-1.41) | 1.49 (1.22-1.83)           | 1.76 (1.24-2.49) | 1.20 (1.00-1.43) | 1.01 (0.84-1.22)       | 1.11 (0.91-1.34)     | 1.23 (1.02-1.49)    |
| <b>By aMED score</b>     |                  |                  |                            |                  |                  |                        |                      |                     |
| Low (T1/T2)              | 1.26 (0.94-1.69) | 1.28 (1.03-1.60) | 1.47 (1.12-1.93)           | 2.48 (1.83-3.37) | 1.24 (1.01-1.52) | 1.04 (0.83-1.31)       | 1.03 (0.81-1.30)     | 1.20 (0.98-1.46)    |
| High (T3)                | 0.66 (0.44-0.99) | 0.84 (0.61-1.16) | 1.44 (1.06-1.97)           | 1.00 (0.62-1.61) | 1.20 (0.89-1.61) | 0.84 (0.65-1.09)       | 1.22 (0.85-1.74)     | 1.23 (0.86-1.74)    |
| P-interaction            | 0.026            | 0.039            | 0.98                       | 0.0017           | 0.86             | 0.49                   | 0.95                 | 0.86                |
| <b>By HEI-2015 score</b> |                  |                  |                            |                  |                  |                        |                      |                     |
| Low (T1/T2)              | 1.25 (0.93-1.69) | 1.25 (1.00-1.55) | 1.49 (1.14-1.94)           | 2.51 (1.85-3.41) | 1.19 (0.96-1.46) | 1.08 (0.86-1.36)       | 1.08 (0.84-1.38)     | 1.21 (0.99-1.48)    |
| High (T3)                | 0.71 (0.44-1.15) | 0.94 (0.65-1.36) | 1.53 (1.08-2.18)           | 1.02 (0.60-1.74) | 1.30 (0.99-1.72) | 0.81 (0.58-1.14)       | 1.09 (0.77-1.56)     | 1.15 (0.81-1.65)    |
| P-interaction            | 0.036            | 0.22             | 0.72                       | 0.019            | 0.40             | 0.50                   | 0.37                 | 0.84                |
| <b>By hPDI score</b>     |                  |                  |                            |                  |                  |                        |                      |                     |
| Low (T1/T2)              | 1.29 (0.93-1.77) | 1.15 (0.91-1.46) | 1.54 (1.14-2.08)           | 2.49 (1.76-3.54) | 1.22 (0.98-1.51) | 1.02 (0.81-1.29)       | 1.13 (0.89-1.44)     | 1.23 (0.98-1.54)    |
| High (T3)                | 0.79 (0.56-1.10) | 1.15 (0.82-1.61) | 1.40 (1.10-1.77)           | 1.19 (0.75-1.86) | 1.30 (0.98-1.71) | 1.02 (0.78-1.34)       | 1.09 (0.83-1.43)     | 1.24 (0.92-1.67)    |
| P-interaction            | 0.048            | 0.60             | 0.91                       | 0.018            | 0.90             | 0.93                   | 0.42                 | 0.89                |

aMED, alternate Mediterranean diet; HEI, Healthy Eating Index; hPDI, healthful Plant-based Diet Index; SD, standard deviation; T, tertile.

Results are relative risks (95% CI) from survey Poisson regressions with adjustment for age, sex, study field center, Hispanic/Latino background, education, annual household income, smoking status, drinking status, total energy intake, physical activity, BMI, hypertension, dyslipidemia, and fasting hours for blood samples.

**ESM Fig. 1. Principal component analysis that distinguished between individuals with high (top quintile) and those with low (bottom quintile) dietary pattern scores.**

The analyses were based on all 624 metabolites (A to C) or the 40 metabolites that were associated with all 3 dietary pattern scores (D to E)

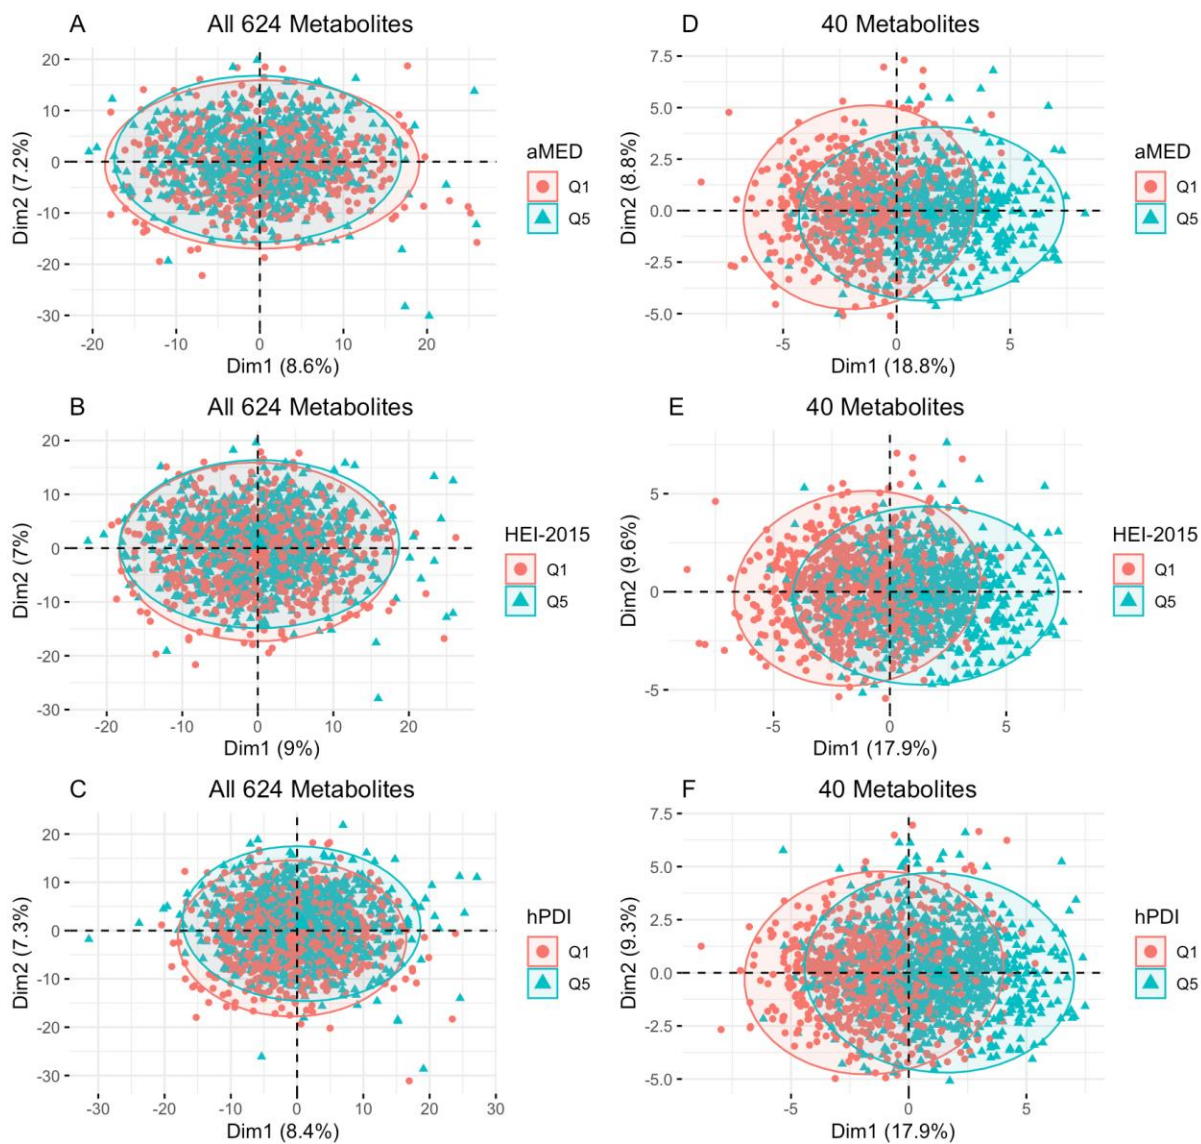

**ESM Fig. 2. Comparison of the relationships between serum metabolites and 3 dietary patterns before and after excluding individuals with undetectable metabolites.**

Effect sizes are regression coefficients from survey linear regression models with adjustment for age, sex, study field center, Hispanic/Latino background, education, annual household income, smoking status, drinking status (not for aMED-only metabolite score), total energy intake, physical activity, BMI, use of antihypertensive drugs, use of lipid-lowering drugs, and fasting hours for blood samples. aMED, alternate Mediterranean diet; HEI, Healthy Eating Index; hPDI, healthful Plant-based Diet Index.

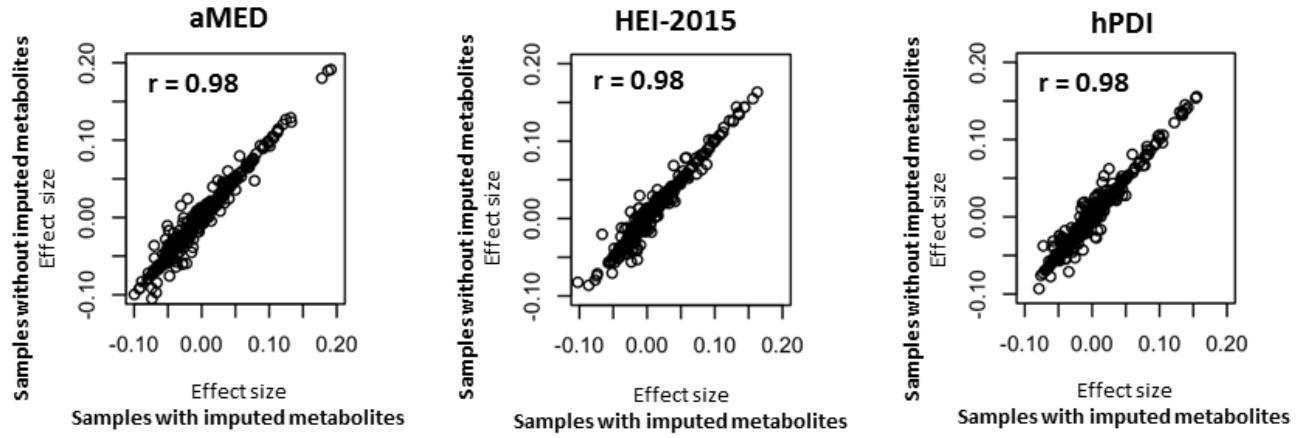

**ESM Fig. 3. Comparison of the relationships between serum metabolites and 3 dietary patterns before and after excluding obese individuals or individuals with Dominican heritage.**

Effect sizes are regression coefficients from survey linear regression models with adjustment for age, sex, study field center, Hispanic/Latino background, education, annual household income, smoking status, drinking status (not for aMED-only metabolite score), total energy intake, physical activity, BMI, use of antihypertensive drugs, use of lipid-lowering drugs, and fasting hours for blood samples. aMED, alternate Mediterranean diet; HEI, Healthy Eating Index; hPDI, healthful Plant-based Diet Index.

**Before vs. after excluding obese individuals (BMI  $\geq 30$  kg/m<sup>2</sup>)**

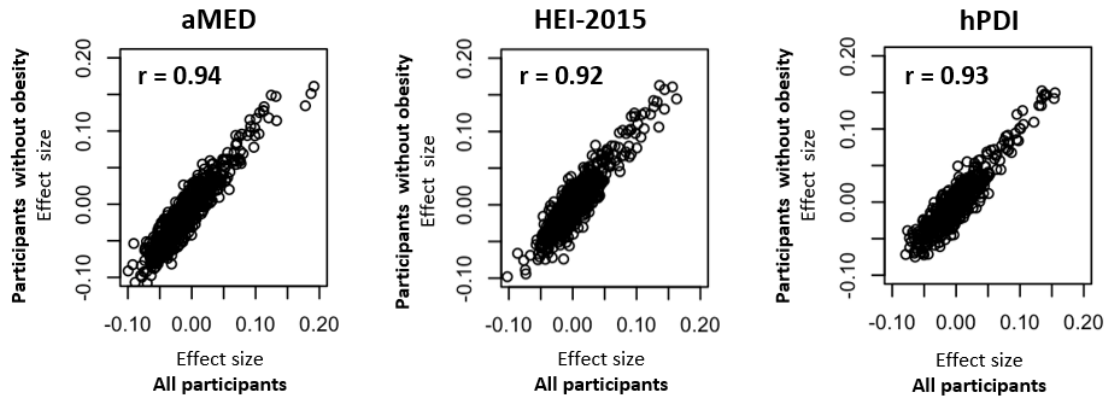

**Before vs. after excluding Dominican individuals**

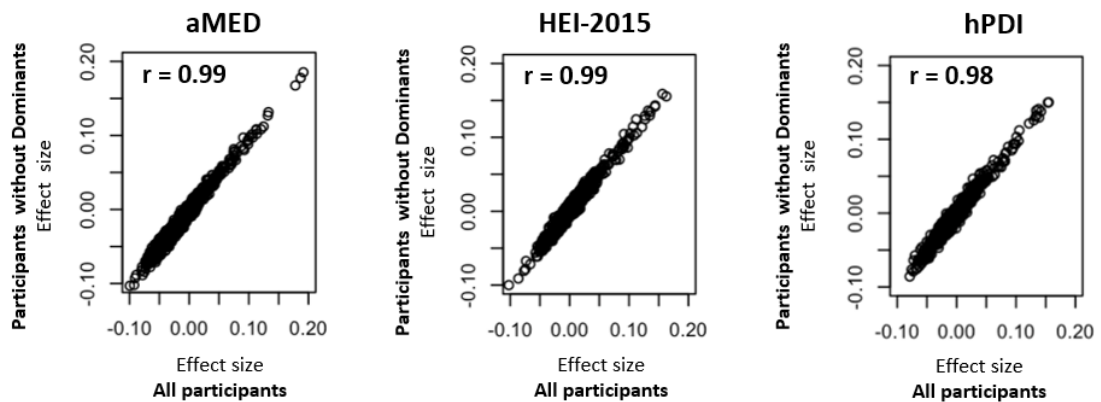

Supplement: NIHMS1868287-supplement-Supplementary_data.pdf [file NIHMS1868287-supplement-Supplementary_data.pdf]
